# Supplementary material for: The invasive freshwater jellyfish Craspedacusta sowerbii: silent invasion of an unknown species?
Source: Research Square preprint supplement (doi:10.21203/rs.3.rs-7392176/v1), 2025-08-21

# The invasive freshwater jellyfish *Craspedacusta sowerbii*: silent invasion of an unknown species?

Guillaume Marchessaux1,*, Kristína Slovák Švolíková2, Barbora Števove2, Ali Serhan Tarkan3,4, Daniela Giannetto5, Cristina Preda6, Belma Kalamujić Stroil7, Maciej K. Mańko8, András Abonyi 9,10, Álmos Becz9, Massimo Morpurgo11, Evgeny A. Pakhomov12,13, Levan Mumladze14, Mar Bosch-Belmar15,16, Aino Hosia17, Patricia Ventura18, Jamileh Javidpour19, Florian Lüskow12,13,20,*

1 Aix Marseille Univ, Université de Toulon, CNRS, IRD, MIO, Marseille, France

2 Department of Ecology, Faculty of Natural Sciences, Comenius University, Mlynská dolina, Bratislava, Slovakia

3 Department of Ecology and Vertebrate Zoology, Faculty of Biology and Environmental Protection, University of Lodz, Lodz, Poland

4 Department of Basic Sciences, Faculty of Fisheries, Muğla Sıtkı Koçman University, Muğla, Türkiye

5 Department of Biology, Faculty of Science, Muğla Sıtkı Koçman University, Muğla, Türkiye

6 Department of Natural Sciences, Ovidius University of Constanta, 1 Universitatii Alley, Constanta, Romania

7 University of Sarajevo, Institute for Genetic Engineering and Biotechnology, Zmaja od Bosne 8, Sarajevo, Bosnia and Herzegovina

8 Laboratory of Plankton Biology, Department of Marine Biology and Biotechnology, University of Gdańsk, Gdynia, Poland

9 MTA-ÖK Lendület Fluvial Ecology Research Group, Institute of Aquatic Ecology, HUN-REN Centre for Ecological Research, Budapest, Hungary

10 WasserCluster Lunz – Biologische Station GmbH, Lunz am See, Austria

11 Museum of Nature South Tyrol, Via Bottai 1, Bolzano, Italy

12 Department of Earth, Ocean and Atmospheric Sciences, University of British Columbia, 2039–2207 Main Mall, Vancouver, British Columbia V6T 1Z4, Canada

13 Institute for the Oceans and Fisheries, University of British Columbia, 2202 Main Mall, Vancouver, British Columbia V6T 1Z4, Canada

14 Institute of Zoology, Ilia State University, G. Tsereteli St. 3/5, 0179, Tbilisi, Georgia

15 Laboratory of Ecology, DiSTeM, University of Palermo, Viale delle Scienze 16, 90128 Palermo, Italy

16 NBFC, National Biodiversity Future Center, 90133 Palermo, Italy

17 Department of Natural History, University Museum of Norway, PO Box 7800, Bergen, Norway

18 Thalassa Marine Research & Environmental Awareness, 286 F route d’Aspremont, Tourrette-Levens, France

19 Department of Biology, University of Southern Denmark, Campusvej 55, 5230 Odense M, Denmark

20 Department of Earth Sciences, Natural Resources and Sustainable Development, Uppsala University, Campus Gotland, Visby, Sweden

* Corresponding authors: Guillaume Marchessaux (guillaume.marchessaux@ird.fr) and Florian Lüskow ([florian.luskow@geo.uu.se](mailto:florian.luskow@geo.uu.se))

# Supplementary materials

**Supplementary Figure 1.** A survey questionnaire was performed to collect the people’s perceptions on *Craspedacusta sowerbii* in the 17 European countries considered.


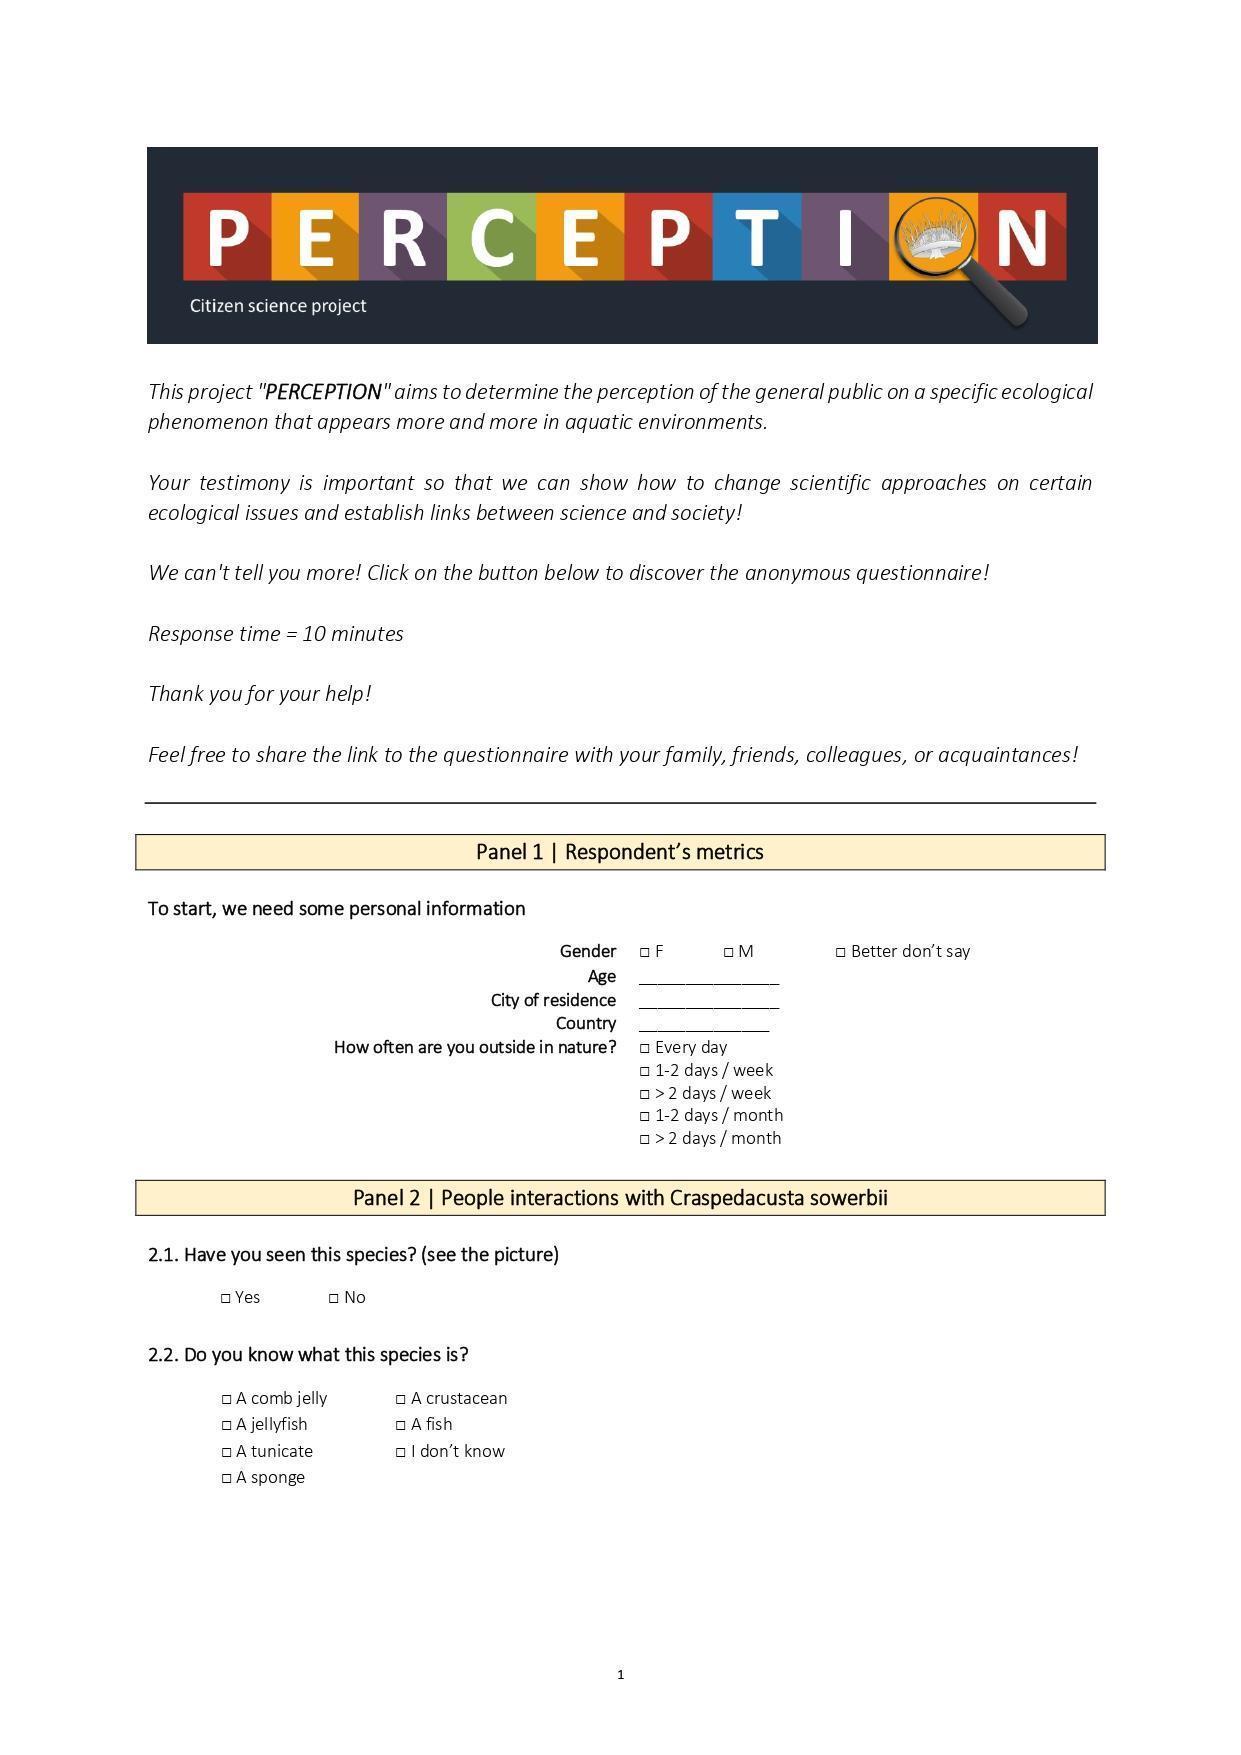


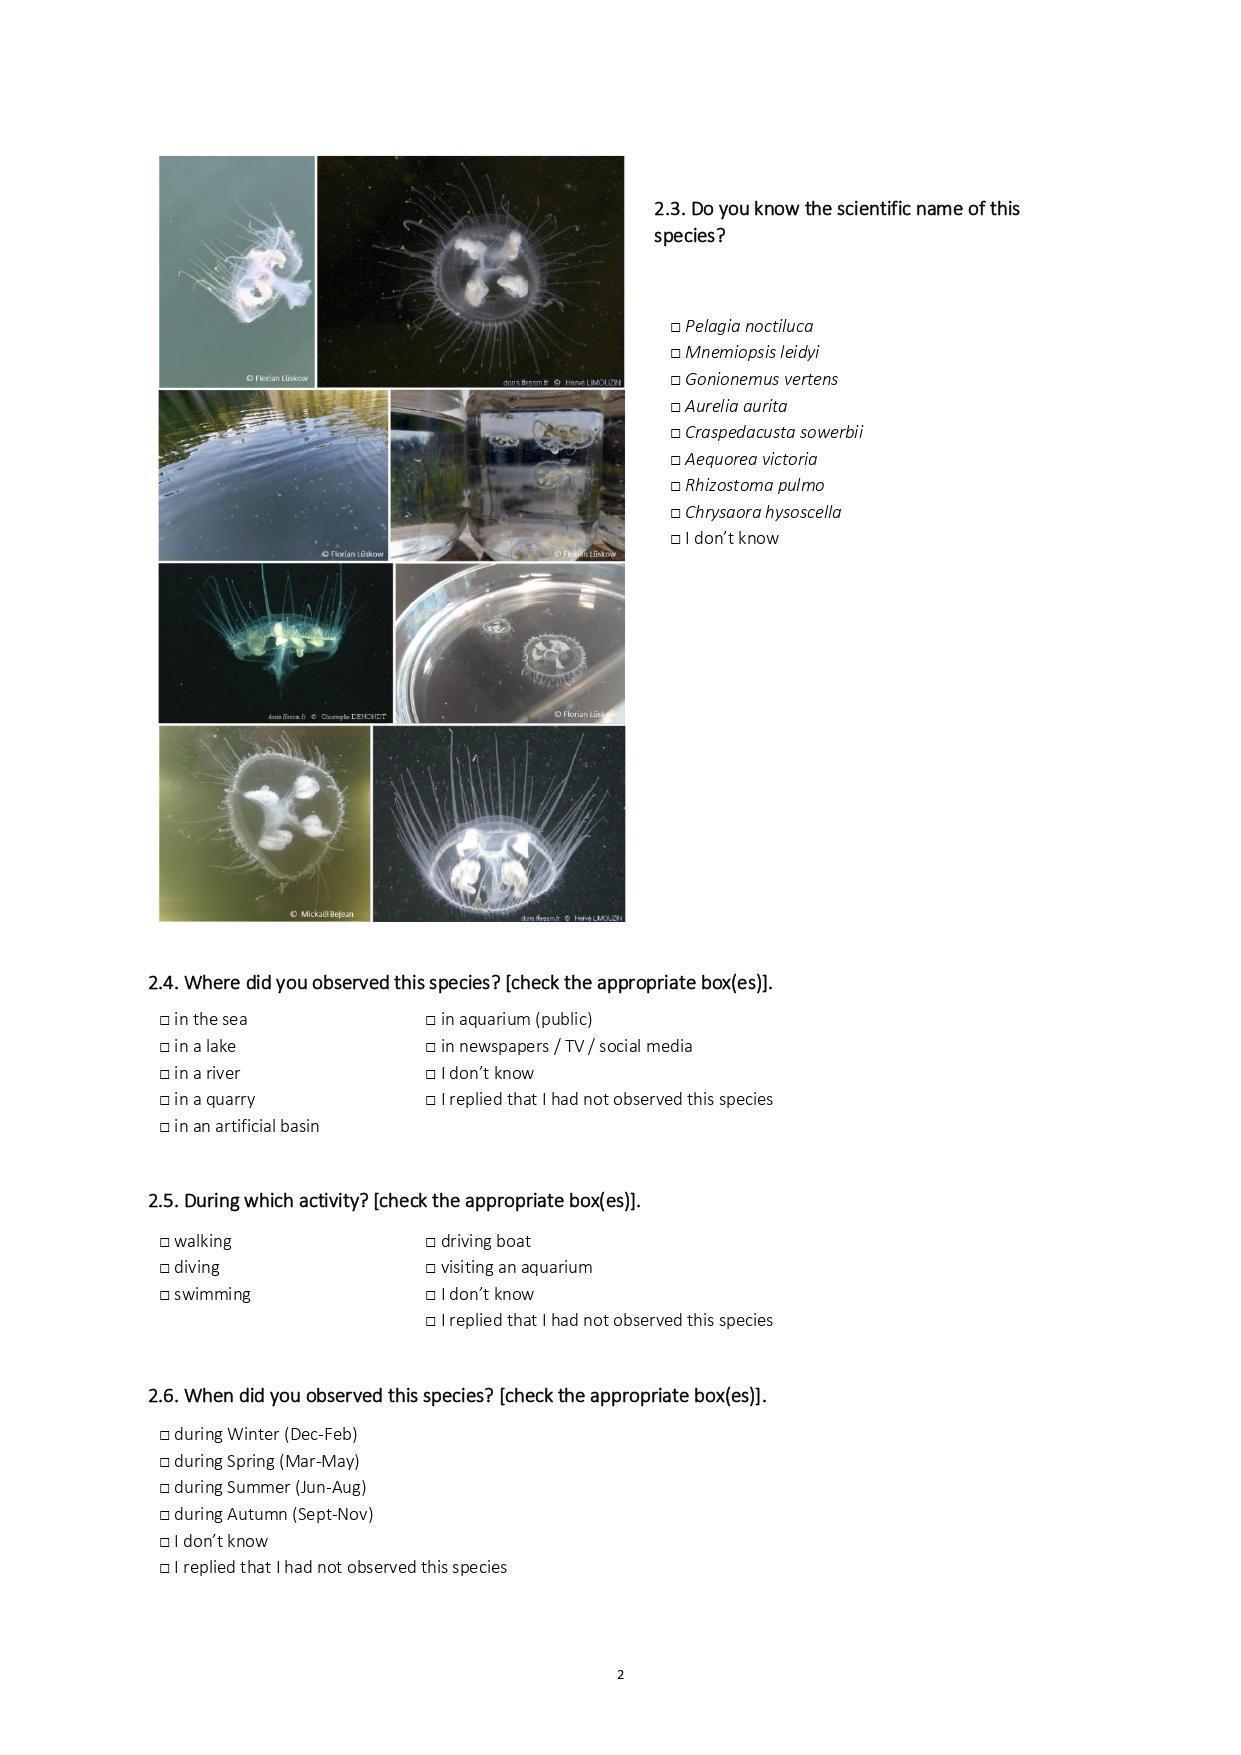

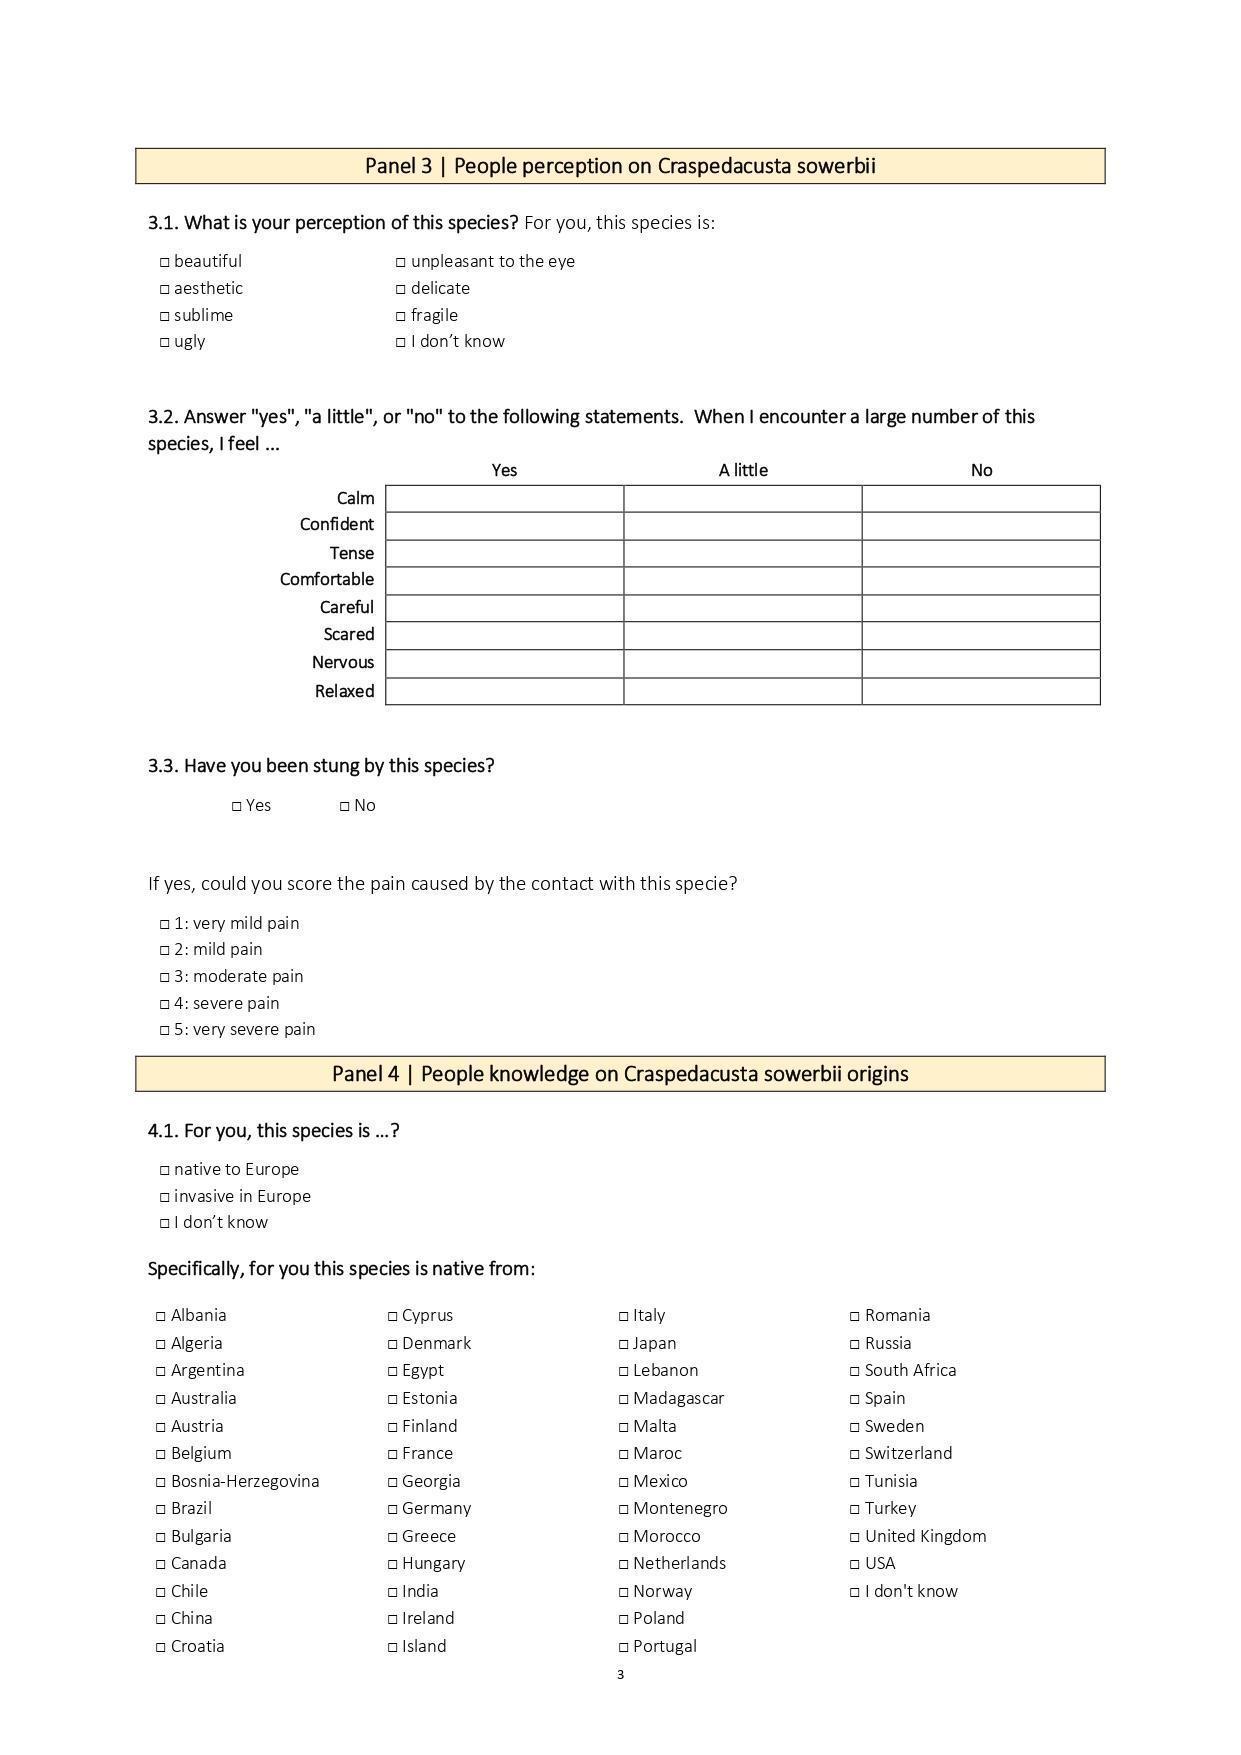


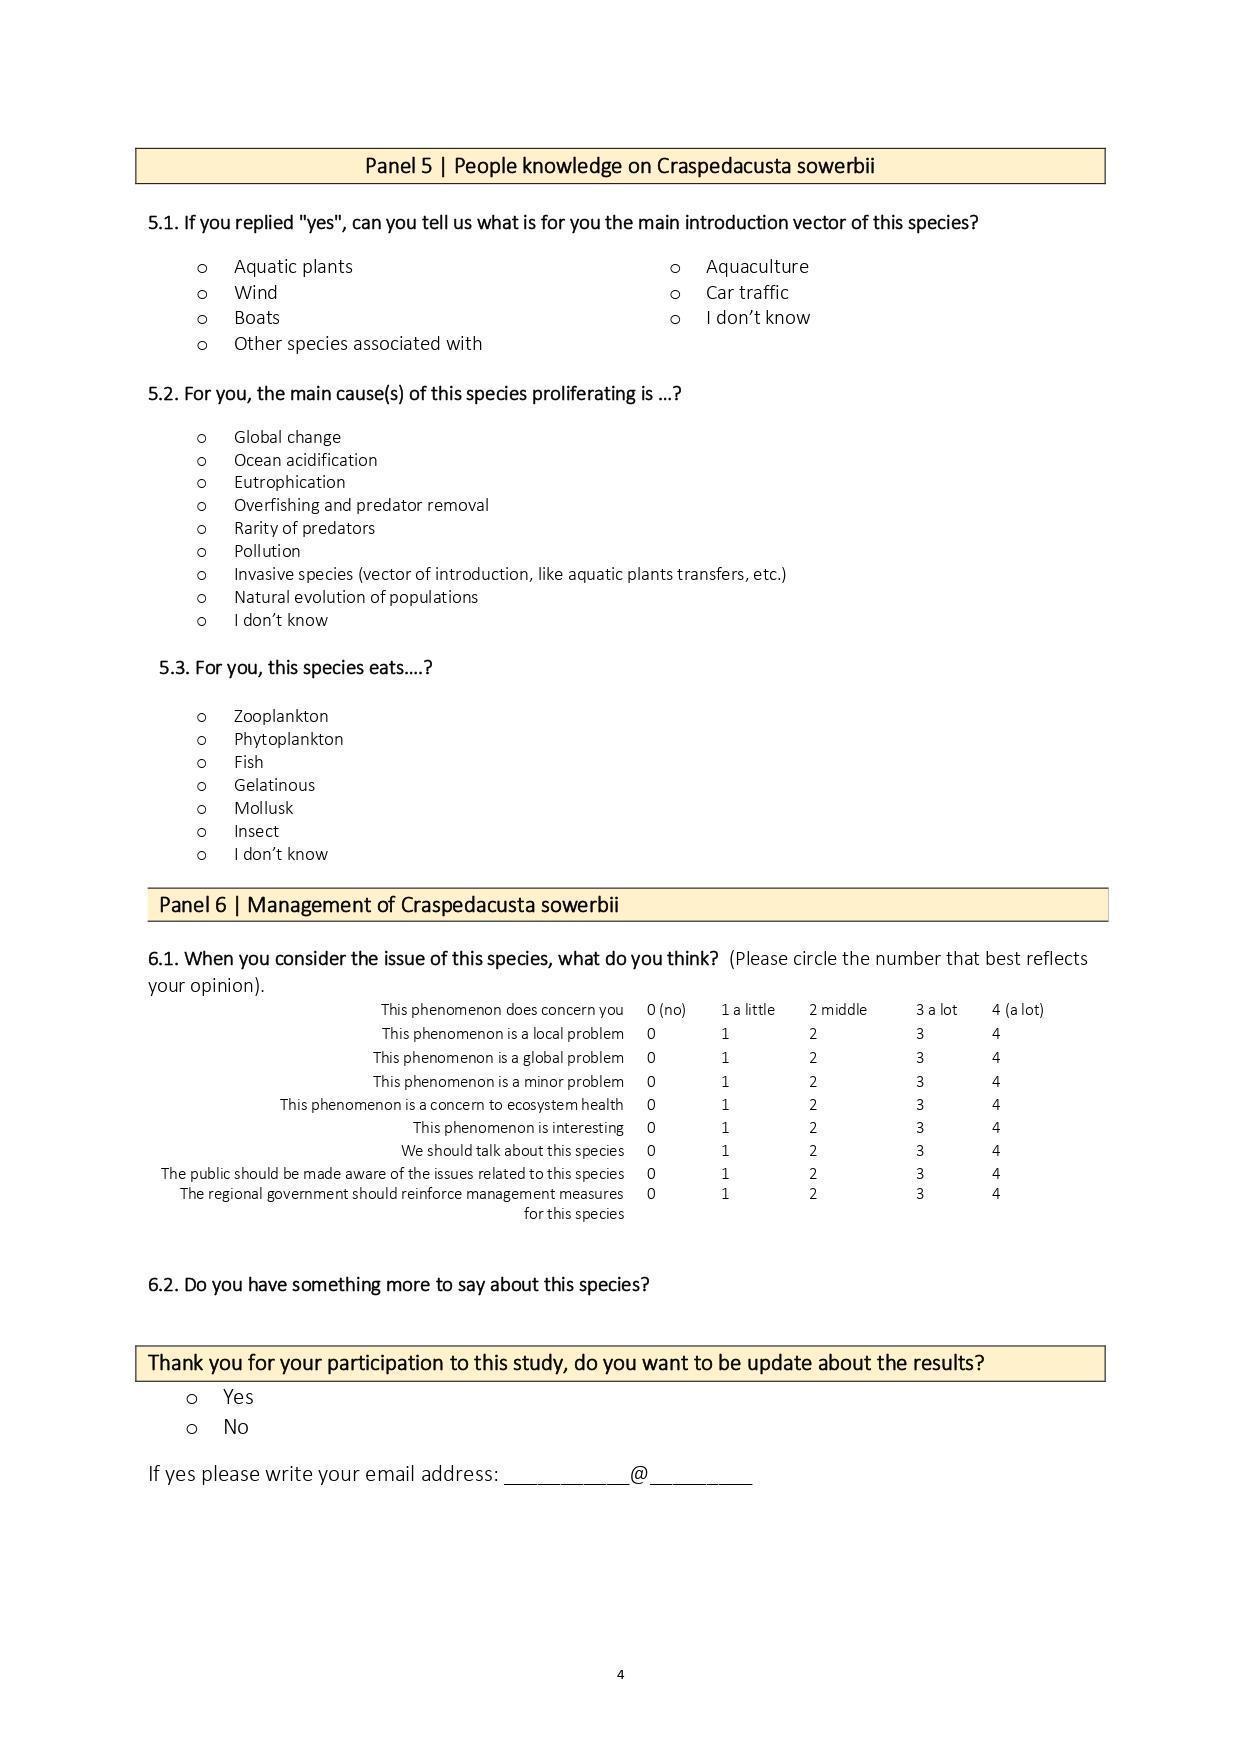


**Supplementary Figure 2.** Generalized linear model (GLM) showing the trend between the number of *Craspedacusta sowerbii* occurrences (extracted from Marchessaux et al. 2021) and the total number of responses for each country studied.


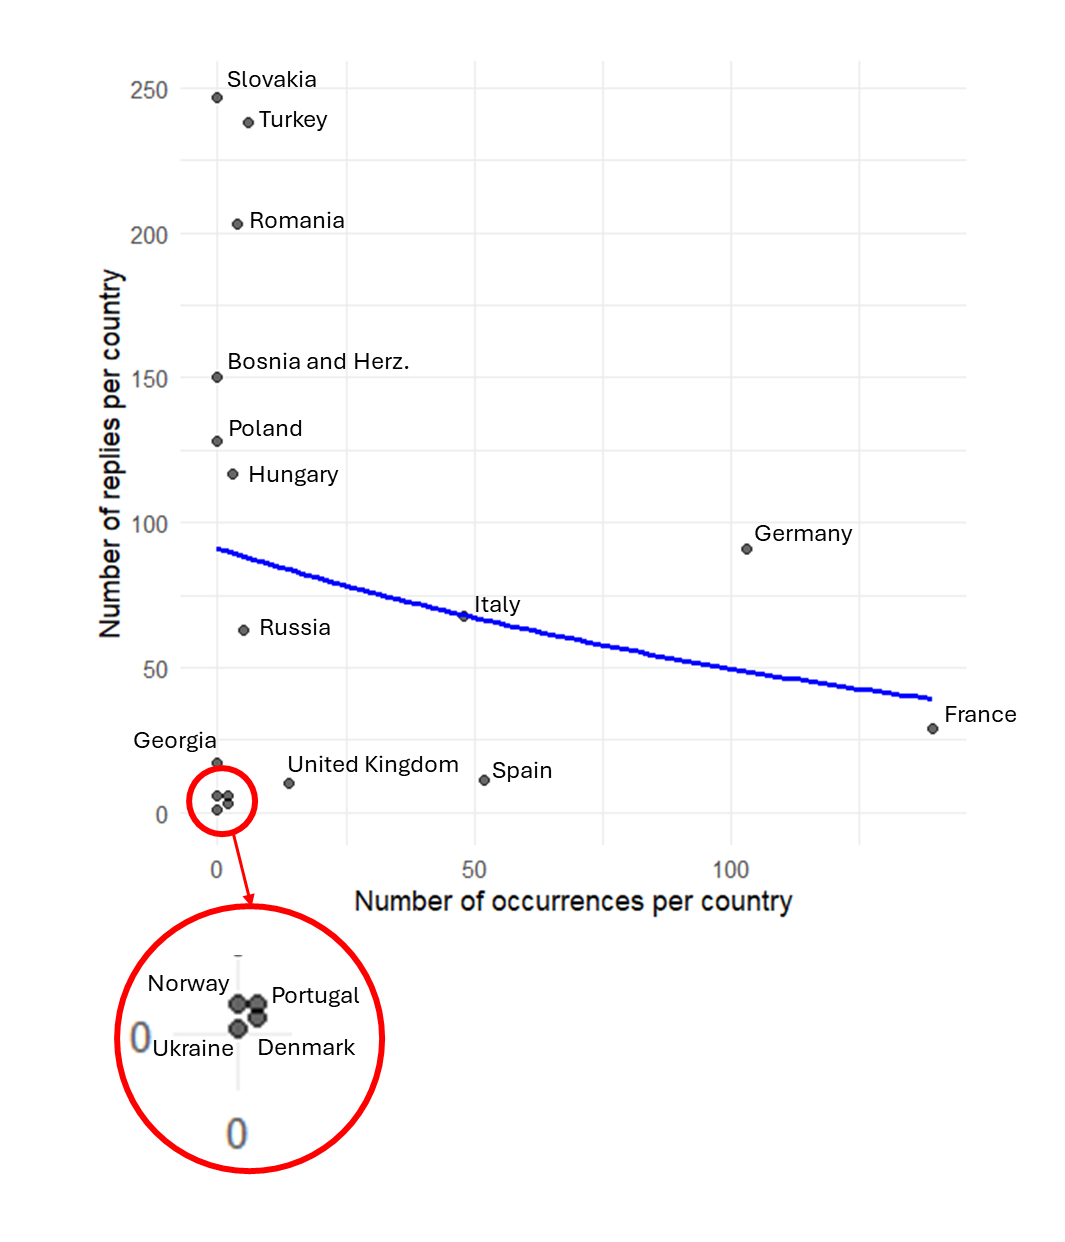

Supplement: Supplementary file 1 [file fc35c299aaaa2f288309e4bd.docx]
